# Supplementary material
Source: bioRxiv or medRxiv preprint supplement (https://www.biorxiv.org/highwire/filestream/69036/field_highwire_adjunct_files/17/216754-8.pdf)
Supplement: Supplementary file [file 216754-8.pdf]

Bladder cancer

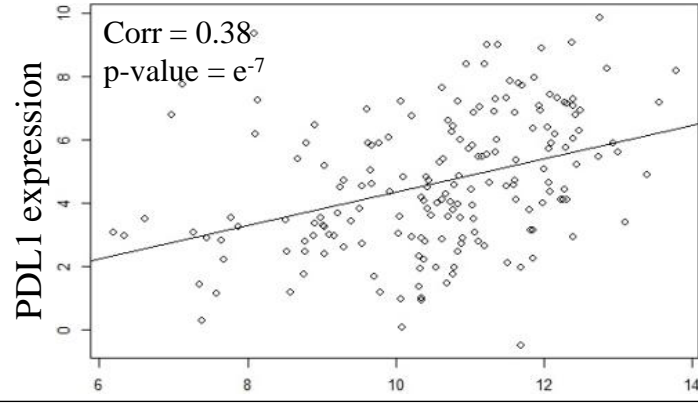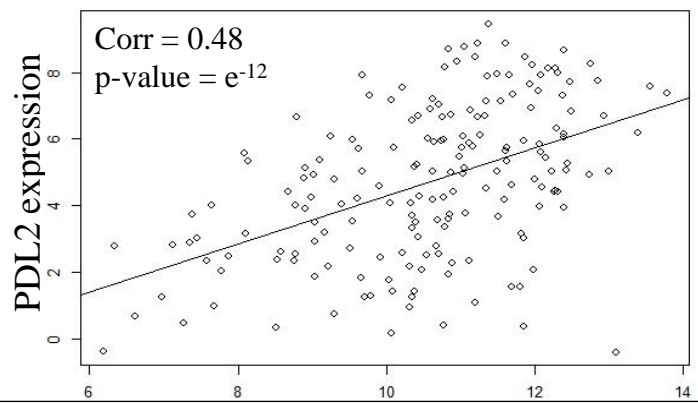

Breast cancer

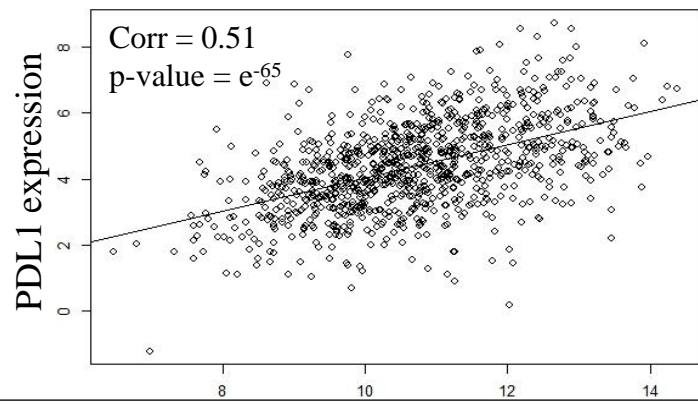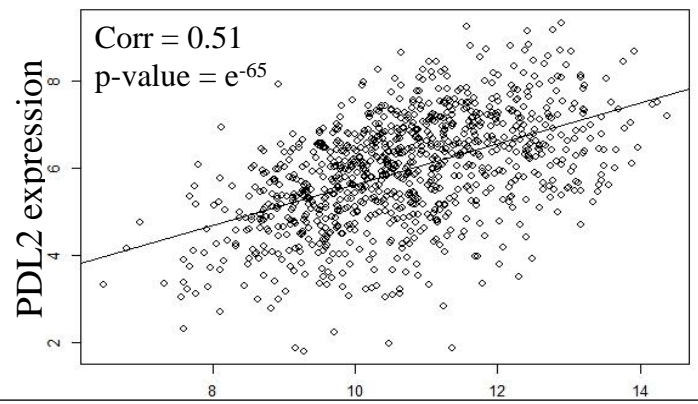

Colorectal cancer

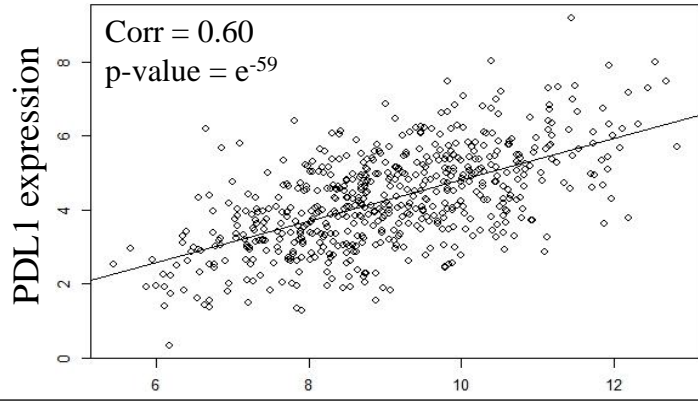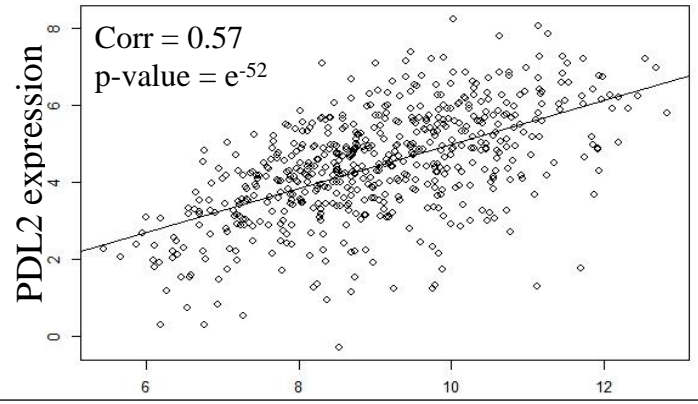

Glioblastoma

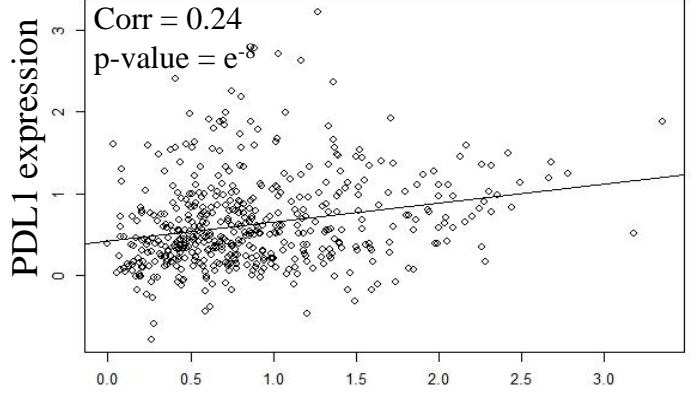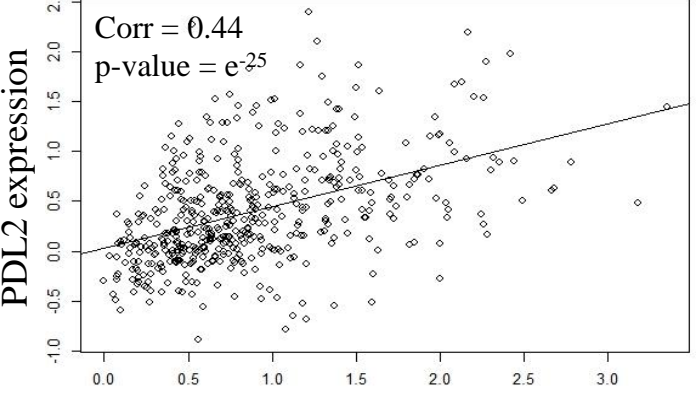

### Head and Neck cancer

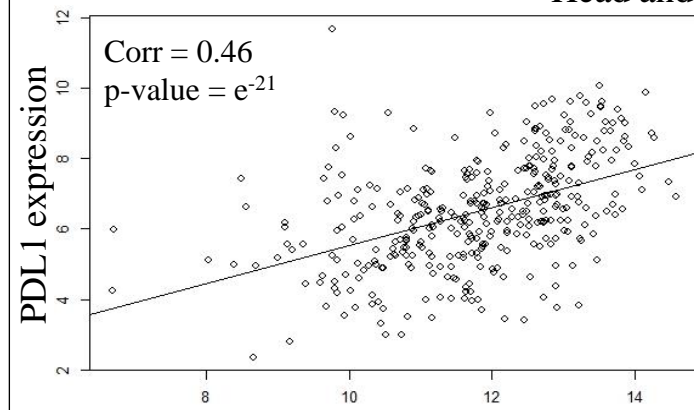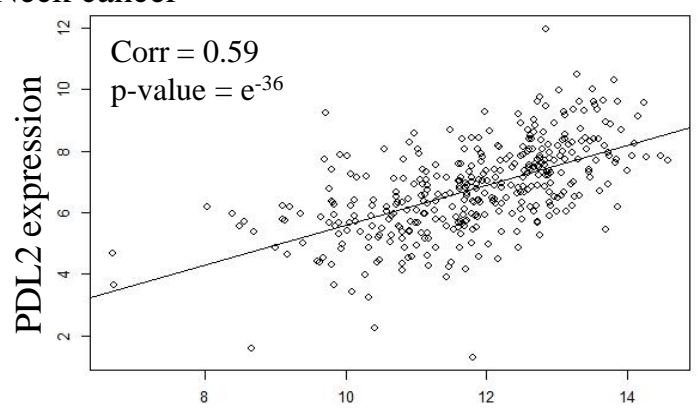

### AML

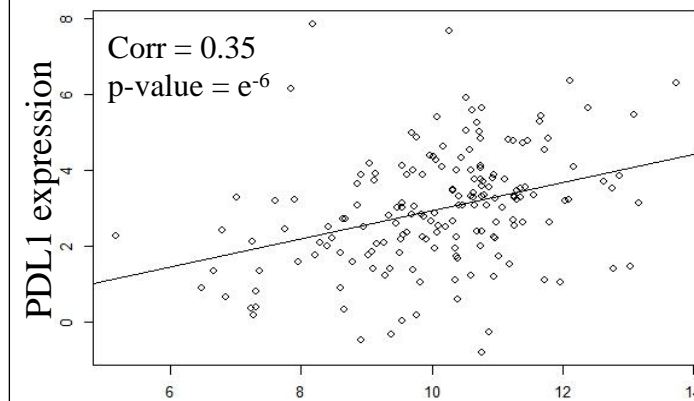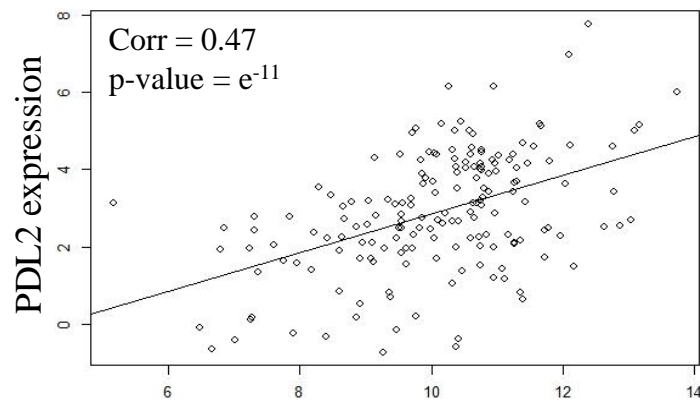

### Lung adenocarcinoma

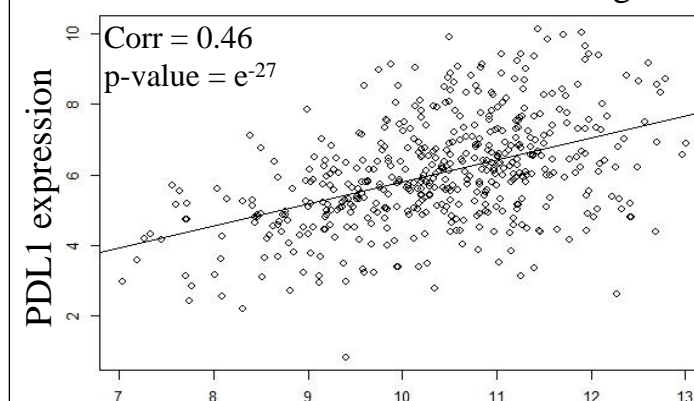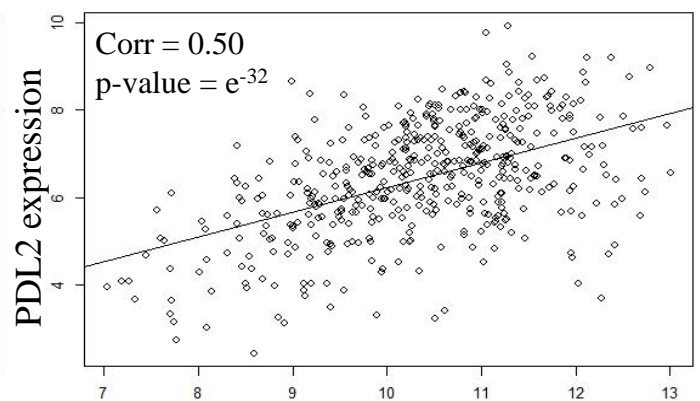

### Lung squamous cell carcinoma

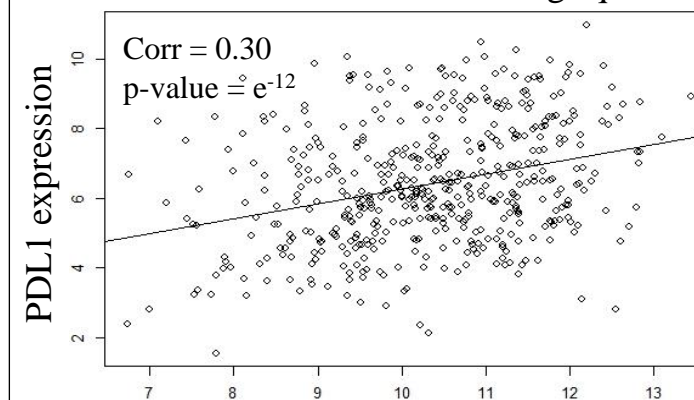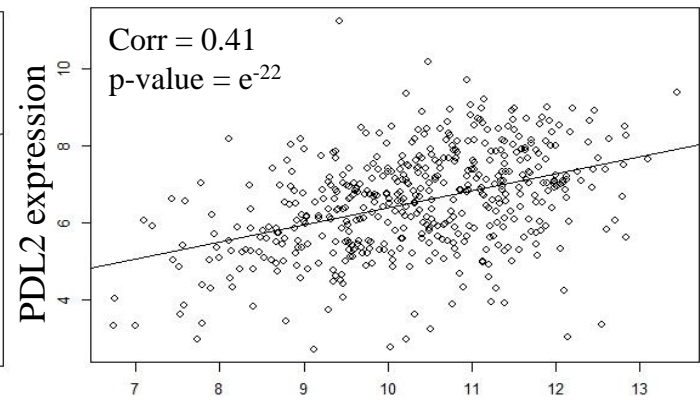

### Ovarian cancer

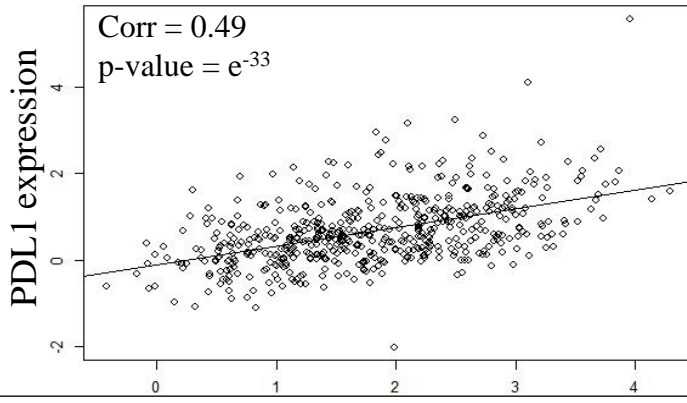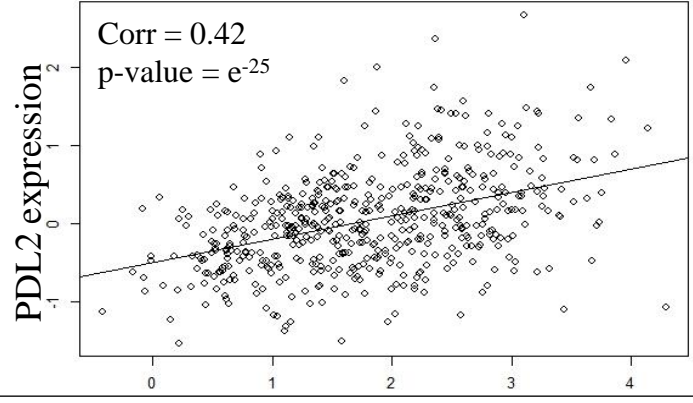

### Endometrial cancer

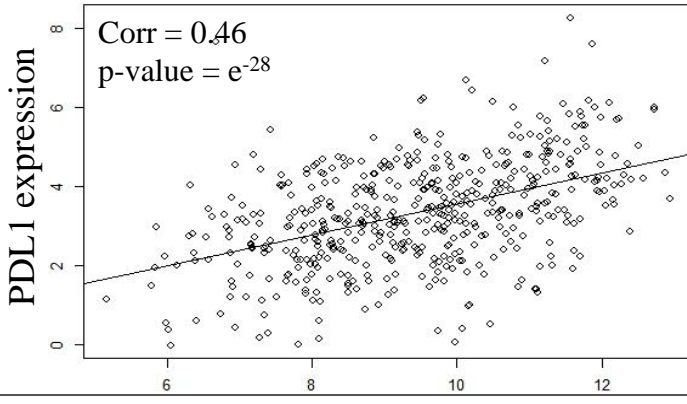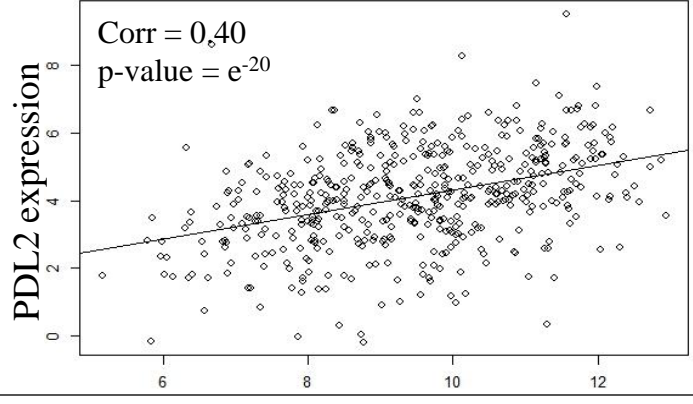

OAS2 expression

OAS2 expression
